# Supplementary material for: Association of Modifiable Health Conditions and Social Determinants of Health With Late Mortality in Survivors of Childhood Cancer
Source: PubMed Central journal article supplement (PMC9918884; doi:10.1001/jamanetworkopen.2022.55395), 2023-02-10
Supplement: jamanetwopen-e2255395-s001.pdf [file jamanetwopen-e2255395-s001.pdf]

## Supplemental Online Content

Ehrhardt MJ, Liu Q, Dixon SB, et al. Association of modifiable health conditions and social determinants of health with late mortality in survivors of childhood cancer. *JAMA Netw Open.* 2023;6(2):e2255395. doi:10.1001/jamanetworkopen.2022.55395

**eTable 1.** Specific Criteria Used to Define Frailty in the St Jude Lifetime Cohort

**eTable 2.** Baseline Modifiable Chronic Health Conditions and Lifestyle Factors Among Adult St. Jude Lifetime Cohort Participants With Baseline Assessments (n = 3407) by Vital Status

**eTable 3.** Frequency of Deaths by Cause Among Survivors Eligible for the St Jude Lifetime Cohort (n = 9440)

**eTable 4.** Mortality Rates (Deaths/1000 Person-Years) by Cause of Death Among All Eligible St Jude Lifetime Cohort Survivors by Every 5-year Period Since Childhood Cancer Diagnosis

**eTable 5.** All-Cause and Cause-Specific Standardized Mortality Ratios (SMRs) and 95% CIs Among Eligible St Jude Lifetime Cohort Survivors (n = 9440) by Sex and Childhood Cancer Diagnosis

**eTable 6.** Multivariable Associations Between Modifiable Risk Factors, Including Specific Chronic Health Conditions and Postbaseline All-Cause and Cause-Specific Mortality Rates in Adult St Jude Lifetime Cohort Participants With an On-Campus Assessment

**eTable 7.** Discrepant Cases Between National Death Index and St Jude Children's Research Hospital Cause of Death Assignment

This supplemental material has been provided by the authors to give readers additional information about their work.

**eTable 1.** Specific Criteria Used to Define Frailty in the St Jude Lifetime Cohort

| Frailty Component <sup>a</sup> | St. Jude Lifetime Cohort Criteria                                                                                                                                                                                                                                                                                                                                                                                                                                                                                                                                                                                                                                                                                                                                                                                                                                                                                                 |                              |                             |              |  |     |           |     |           |                             |              |                             |              |                              |              |                              |                |                              |              |                              |              |                          |              |                          |              |
|--------------------------------|-----------------------------------------------------------------------------------------------------------------------------------------------------------------------------------------------------------------------------------------------------------------------------------------------------------------------------------------------------------------------------------------------------------------------------------------------------------------------------------------------------------------------------------------------------------------------------------------------------------------------------------------------------------------------------------------------------------------------------------------------------------------------------------------------------------------------------------------------------------------------------------------------------------------------------------|------------------------------|-----------------------------|--------------|--|-----|-----------|-----|-----------|-----------------------------|--------------|-----------------------------|--------------|------------------------------|--------------|------------------------------|----------------|------------------------------|--------------|------------------------------|--------------|--------------------------|--------------|--------------------------|--------------|
| Low lean muscle mass           | Lean muscle mass by dual x-ray absorptiometry $\leq -1.5$ age and sex specific SDS when compared to data from a national sample (National Health and Nutrition Examination Survey [NHANES]) <sup>b</sup>                                                                                                                                                                                                                                                                                                                                                                                                                                                                                                                                                                                                                                                                                                                          |                              |                             |              |  |     |           |     |           |                             |              |                             |              |                              |              |                              |                |                              |              |                              |              |                          |              |                          |              |
| Self-reported exhaustion       | Score $\leq 40$ (1 SDS, based on a standard normal distribution, this represents approximately the lowest 6.7% of the general population) on the Vitality Subscale of the Medical Outcomes Survey Short Form 36 (SF-36) <sup>c</sup>                                                                                                                                                                                                                                                                                                                                                                                                                                                                                                                                                                                                                                                                                              |                              |                             |              |  |     |           |     |           |                             |              |                             |              |                              |              |                              |                |                              |              |                              |              |                          |              |                          |              |
| Low-energy expenditure         | Expended $< 383$ Kcal per week (males) or $< 270$ Kcal per week (females) during Leisure Time Physical Activity based on the NHANES Physical Activity Questionnaire <sup>d</sup>                                                                                                                                                                                                                                                                                                                                                                                                                                                                                                                                                                                                                                                                                                                                                  |                              |                             |              |  |     |           |     |           |                             |              |                             |              |                              |              |                              |                |                              |              |                              |              |                          |              |                          |              |
| Slowness                       | Females $< 159$ and males $< 173$ centimeters tall were classified as slow if they took $\geq 7$ seconds, and females $\geq 159$ and males $\geq 173$ centimeters tall were classified as slow if they took $\geq 6$ seconds to walk 15 feet at their usual pace                                                                                                                                                                                                                                                                                                                                                                                                                                                                                                                                                                                                                                                                  |                              |                             |              |  |     |           |     |           |                             |              |                             |              |                              |              |                              |                |                              |              |                              |              |                          |              |                          |              |
| Weakness                       | Hand grip strength stratified by body mass index and sex                                                                                                                                                                                                                                                                                                                                                                                                                                                                                                                                                                                                                                                                                                                                                                                                                                                                          |                              |                             |              |  |     |           |     |           |                             |              |                             |              |                              |              |                              |                |                              |              |                              |              |                          |              |                          |              |
|                                | <table border="1" style="width: 100%; border-collapse: collapse;"> <thead> <tr> <th colspan="2">Males</th> <th colspan="2">Females</th> </tr> <tr> <th>BMI</th> <th>Cut point</th> <th>BMI</th> <th>Cut point</th> </tr> </thead> <tbody> <tr> <td><math>\leq 24</math> kg/m<sup>2</sup></td> <td><math>\leq 29</math> kg</td> <td><math>\leq 23</math> kg/m<sup>2</sup></td> <td><math>\leq 17</math> kg</td> </tr> <tr> <td>24.1 to 26 kg/m<sup>2</sup></td> <td><math>\leq 30</math> kg</td> <td>23.1 to 26 kg/m<sup>2</sup></td> <td><math>\leq 17.3</math> kg</td> </tr> <tr> <td>26.1 to 28 kg/m<sup>2</sup></td> <td><math>\leq 30</math> kg</td> <td>26.1 to 29 kg/m<sup>2</sup></td> <td><math>\leq 18</math> kg</td> </tr> <tr> <td><math>&gt; 28</math> kg/m<sup>2</sup></td> <td><math>\leq 32</math> kg</td> <td><math>&gt; 29</math> kg/m<sup>2</sup></td> <td><math>\leq 21</math> kg</td> </tr> </tbody> </table> | Males                        |                             | Females      |  | BMI | Cut point | BMI | Cut point | $\leq 24$ kg/m <sup>2</sup> | $\leq 29$ kg | $\leq 23$ kg/m <sup>2</sup> | $\leq 17$ kg | 24.1 to 26 kg/m <sup>2</sup> | $\leq 30$ kg | 23.1 to 26 kg/m <sup>2</sup> | $\leq 17.3$ kg | 26.1 to 28 kg/m <sup>2</sup> | $\leq 30$ kg | 26.1 to 29 kg/m <sup>2</sup> | $\leq 18$ kg | $> 28$ kg/m <sup>2</sup> | $\leq 32$ kg | $> 29$ kg/m <sup>2</sup> | $\leq 21$ kg |
|                                | Males                                                                                                                                                                                                                                                                                                                                                                                                                                                                                                                                                                                                                                                                                                                                                                                                                                                                                                                             |                              | Females                     |              |  |     |           |     |           |                             |              |                             |              |                              |              |                              |                |                              |              |                              |              |                          |              |                          |              |
|                                | BMI                                                                                                                                                                                                                                                                                                                                                                                                                                                                                                                                                                                                                                                                                                                                                                                                                                                                                                                               | Cut point                    | BMI                         | Cut point    |  |     |           |     |           |                             |              |                             |              |                              |              |                              |                |                              |              |                              |              |                          |              |                          |              |
|                                | $\leq 24$ kg/m <sup>2</sup>                                                                                                                                                                                                                                                                                                                                                                                                                                                                                                                                                                                                                                                                                                                                                                                                                                                                                                       | $\leq 29$ kg                 | $\leq 23$ kg/m <sup>2</sup> | $\leq 17$ kg |  |     |           |     |           |                             |              |                             |              |                              |              |                              |                |                              |              |                              |              |                          |              |                          |              |
| 24.1 to 26 kg/m <sup>2</sup>   | $\leq 30$ kg                                                                                                                                                                                                                                                                                                                                                                                                                                                                                                                                                                                                                                                                                                                                                                                                                                                                                                                      | 23.1 to 26 kg/m <sup>2</sup> | $\leq 17.3$ kg              |              |  |     |           |     |           |                             |              |                             |              |                              |              |                              |                |                              |              |                              |              |                          |              |                          |              |
| 26.1 to 28 kg/m <sup>2</sup>   | $\leq 30$ kg                                                                                                                                                                                                                                                                                                                                                                                                                                                                                                                                                                                                                                                                                                                                                                                                                                                                                                                      | 26.1 to 29 kg/m <sup>2</sup> | $\leq 18$ kg                |              |  |     |           |     |           |                             |              |                             |              |                              |              |                              |                |                              |              |                              |              |                          |              |                          |              |
| $> 28$ kg/m <sup>2</sup>       | $\leq 32$ kg                                                                                                                                                                                                                                                                                                                                                                                                                                                                                                                                                                                                                                                                                                                                                                                                                                                                                                                      | $> 29$ kg/m <sup>2</sup>     | $\leq 21$ kg                |              |  |     |           |     |           |                             |              |                             |              |                              |              |                              |                |                              |              |                              |              |                          |              |                          |              |
|                                |                                                                                                                                                                                                                                                                                                                                                                                                                                                                                                                                                                                                                                                                                                                                                                                                                                                                                                                                   |                              |                             |              |  |     |           |     |           |                             |              |                             |              |                              |              |                              |                |                              |              |                              |              |                          |              |                          |              |
|                                |                                                                                                                                                                                                                                                                                                                                                                                                                                                                                                                                                                                                                                                                                                                                                                                                                                                                                                                                   |                              |                             |              |  |     |           |     |           |                             |              |                             |              |                              |              |                              |                |                              |              |                              |              |                          |              |                          |              |
|                                |                                                                                                                                                                                                                                                                                                                                                                                                                                                                                                                                                                                                                                                                                                                                                                                                                                                                                                                                   |                              |                             |              |  |     |           |     |           |                             |              |                             |              |                              |              |                              |                |                              |              |                              |              |                          |              |                          |              |

a. Fried LP, Tangen CM, Walston J, et al: Frailty in older adults: evidence for a phenotype. *J Gerontol A Biol Sci Med Sci* 56:M146-56, 2001

b. Kelly TL, Wilson KE, Heymsfield SB: Dual energy X-Ray absorptiometry body composition reference values from NHANES. *PLoS One* 4:e7038, 2009

c. Ware JE, Jr., Sherbourne CD: The MOS 36-item short-form health survey (SF-36). I. Conceptual framework and item selection. *Med Care* 30:473-83, 1992

d. National Health and Nutrition Examination Survey, 2005 - 2006 Data Documentation, Codebook, and Frequencies Physical Activity Monitor (PAXRAW\_D). [http://www.cdc.gov/nchs/nhanes/nhanes2005-2006/PAXRAW\\_D.htm](http://www.cdc.gov/nchs/nhanes/nhanes2005-2006/PAXRAW_D.htm)

**eTable 2.** Baseline Modifiable Chronic Health Conditions and Lifestyle Factors Among Adult St. Jude Lifetime Cohort Participants With Baseline Assessments (n = 3407) by Vital Status

| Characteristics                      | Total<br>N=3,407 |      | Alive<br>N=3,284 |      | Dead<br>N=123 |      | P value |
|--------------------------------------|------------------|------|------------------|------|---------------|------|---------|
|                                      | N                | (%)  | N                | (%)  | N             | (%)  |         |
| <b>Frailty</b>                       |                  |      |                  |      |               |      | <.001   |
| No                                   | 2,280            | (69) | 2,223            | (70) | 57            | (48) |         |
| Prefrail                             | 721              | (22) | 686              | (22) | 35            | (30) |         |
| Frail                                | 285              | (9)  | 259              | (8)  | 26            | (22) |         |
| <b>Healthy lifestyle index score</b> |                  |      |                  |      |               |      | 0.002   |
| 0                                    | 179              | (5)  | 165              | (5)  | 14            | (11) |         |
| 1                                    | 670              | (20) | 639              | (20) | 31            | (25) |         |
| 2                                    | 1,275            | (38) | 1,229            | (38) | 46            | (38) |         |
| 3                                    | 967              | (29) | 939              | (29) | 28            | (23) |         |
| 4                                    | 266              | (8)  | 263              | (8)  | 3             | (2)  |         |
| <b>Chronic condition grade</b>       |                  |      |                  |      |               |      |         |
| Dyslipidemia <sup>a</sup>            |                  |      |                  |      |               |      | 0.01    |
| 0                                    | 2,229            | (65) | 2,151            | (65) | 78            | (63) |         |
| 1                                    | 688              | (20) | 672              | (20) | 16            | (13) |         |
| 2                                    | 388              | (11) | 367              | (11) | 21            | (17) |         |
| 3                                    | 93               | (3)  | 86               | (3)  | 7             | (6)  |         |
| 4                                    | 9                | (0)  | 8                | (0)  | 1             | (1)  |         |
| Hypertension                         |                  |      |                  |      |               |      | <.001   |
| 0                                    | 1,535            | (45) | 1,509            | (46) | 26            | (21) |         |
| 1                                    | 1,183            | (35) | 1,151            | (35) | 32            | (26) |         |
| 2                                    | 523              | (15) | 483              | (15) | 40            | (33) |         |
| 3                                    | 166              | (5)  | 141              | (4)  | 25            | (20) |         |
| Diabetes                             |                  |      |                  |      |               |      | <.001   |
| 0                                    | 2,671            | (78) | 2,606            | (79) | 65            | (53) |         |
| 1                                    | 448              | (13) | 413              | (13) | 35            | (28) |         |
| 2                                    | 170              | (5)  | 156              | (5)  | 14            | (11) |         |
| 3                                    | 118              | (3)  | 109              | (3)  | 9             | (7)  |         |
| Underweight/Obesity <sup>a,b</sup>   |                  |      |                  |      |               |      | 0.22    |
| 0                                    | 1,209            | (35) | 1,169            | (36) | 40            | (33) |         |
| 2                                    | 1,049            | (31) | 1,006            | (31) | 43            | (35) |         |
| 3                                    | 910              | (27) | 883              | (27) | 27            | (22) |         |
| 4                                    | 239              | (7)  | 226              | (7)  | 13            | (11) |         |
| Bone mineral deficiency              |                  |      |                  |      |               |      | 0.02    |
| 0                                    | 1,949            | (57) | 1,875            | (57) | 74            | (60) |         |
| 1                                    | 1,106            | (32) | 1,077            | (33) | 29            | (24) |         |
| 2                                    | 352              | (10) | 332              | (10) | 20            | (16) |         |
| Hypogonadism                         |                  |      |                  |      |               |      | <.001   |
| 0                                    | 2,513            | (74) | 2,457            | (75) | 56            | (46) |         |
| 1                                    | 324              | (10) | 301              | (9)  | 23            | (19) |         |
| 2                                    | 339              | (10) | 316              | (10) | 23            | (19) |         |
| 3                                    | 231              | (7)  | 210              | (6)  | 21            | (17) |         |
| Hypothyroidism                       |                  |      |                  |      |               |      | 0.001   |
| 0                                    | 2,688            | (79) | 2,607            | (79) | 81            | (66) |         |
| 1                                    | 23               | (1)  | 23               | (1)  | 0             | (0)  |         |
| 2                                    | 694              | (20) | 652              | (20) | 42            | (34) |         |
| 3                                    | 2                | (0)  | 2                | (0)  | 0             | (0)  |         |

| Characteristics       | Total<br>N=3,407 |      | Alive<br>N=3,284 |      | Dead<br>N=123 |      | P value |
|-----------------------|------------------|------|------------------|------|---------------|------|---------|
|                       | N                | (%)  | N                | (%)  | N             | (%)  |         |
| Adrenal insufficiency |                  |      |                  |      |               |      | 0.91    |
| 0                     | 3,210            | (94) | 3,093            | (94) | 117           | (95) |         |
| 1                     | 107              | (3)  | 103              | (3)  | 4             | (3)  |         |
| 2                     | 87               | (3)  | 85               | (3)  | 2             | (2)  |         |
| 3                     | 3                | (0)  | 3                | (0)  | 0             | (0)  |         |

<sup>a</sup> Only dyslipidemia and underweight/obesity include a grade 4

<sup>b</sup> Underweight/Obesity does not include a grade 1

**eTable 3.** Frequency of Deaths by Cause Among Survivors Eligible for the St Jude Lifetime Cohort (n = 9440)

| Causes                                                                               | ICD-10 Code                                                                                                   | ICD-9 Code                                                                                                                                | Total Deaths |             | Male       |             | Female     |             | Participants <sup>a</sup> |            | Non-participants |             |
|--------------------------------------------------------------------------------------|---------------------------------------------------------------------------------------------------------------|-------------------------------------------------------------------------------------------------------------------------------------------|--------------|-------------|------------|-------------|------------|-------------|---------------------------|------------|------------------|-------------|
|                                                                                      |                                                                                                               |                                                                                                                                           | N            | %           | N          | %           | N          | %           | N                         | %          | N                | %           |
| <b>Total</b>                                                                         |                                                                                                               |                                                                                                                                           | <b>1,281</b> |             | <b>770</b> |             | <b>511</b> |             | <b>155</b>                |            | <b>1,126</b>     |             |
| <b>Recurrence</b>                                                                    |                                                                                                               |                                                                                                                                           | <b>492</b>   | <b>38.4</b> | <b>307</b> | <b>39.9</b> | <b>185</b> | <b>36.2</b> | <b>5</b>                  | <b>3.2</b> | <b>487</b>       | <b>43.3</b> |
| <b>Subsequent neoplasms</b>                                                          |                                                                                                               |                                                                                                                                           | <b>353</b>   |             | <b>184</b> |             | <b>169</b> |             | <b>63</b>                 |            | <b>290</b>       |             |
| Oropharyngeal and gastrointestinal malignancies                                      | C00-C25                                                                                                       | 140-157                                                                                                                                   | 47           | 3.7         | 32         | 4.2         | 15         | 2.9         | 12                        | 7.7        | 35               | 3.1         |
| Laryngeal, tracheal and Lung malignancies                                            | C32-34                                                                                                        | 161-162                                                                                                                                   | 8            | 0.6         | 5          | 0.6         | 3          | 0.6         | 0                         | 0.0        | 8                | 0.7         |
| Malignancies of the skin                                                             | C43-44                                                                                                        | 172-173                                                                                                                                   | 1            | 0.1         | 1          | 0.1         | 0          | 0.0         | 0                         | 0.0        | 1                | 0.1         |
| Breast cancer                                                                        | C50                                                                                                           | 174-175                                                                                                                                   | 19           | 1.5         | 0          | 0.0         | 19         | 3.7         | 4                         | 2.6        | 15               | 1.3         |
| Genitourinary malignancies                                                           | C51-58, C60-68                                                                                                | 179-189                                                                                                                                   | 13           | 1.0         | 4          | 0.5         | 9          | 1.8         | 4                         | 2.6        | 9                | 0.8         |
| CNS malignancies                                                                     | C70-C72                                                                                                       | 191-192                                                                                                                                   | 79           | 6.2         | 42         | 5.5         | 37         | 7.2         | 8                         | 5.2        | 71               | 6.3         |
| Hodgkin's disease                                                                    | C81                                                                                                           | 201                                                                                                                                       | 7            | 0.5         | 5          | 0.6         | 2          | 0.4         | 3                         | 1.9        | 4                | 0.4         |
| Non-Hodgkin's lymphoma                                                               | C82-C85                                                                                                       | 200,202                                                                                                                                   | 11           | 0.9         | 7          | 0.9         | 4          | 0.8         | 6                         | 3.9        | 5                | 0.4         |
| Leukemia                                                                             | C91-C95                                                                                                       | 204-208                                                                                                                                   | 51           | 4.0         | 33         | 4.3         | 18         | 3.5         | 2                         | 1.3        | 49               | 4.4         |
| Malignant neoplasm of bone, articular cartilage, or other connective and soft tissue | C40, C41, C49                                                                                                 | 170, 171                                                                                                                                  | 43           | 3.4         | 19         | 2.5         | 24         | 4.7         | 5                         | 3.2        | 38               | 3.4         |
| Benign meningioma                                                                    | D32                                                                                                           | 225.2 and 225.4                                                                                                                           | 6            | 0.5         | 2          | 0.3         | 4          | 0.8         | 3                         | 1.9        | 3                | 0.3         |
| All other malignant and other neoplasms                                              | C26-C31, C37-39, C45-48, C69, C73-C80, C88, C90, C96 excluding C96.9, C97, D010, D126, D180, D332, D361, D469 | 158-160,163-165,173, 190,193-199, 203, 209, 212.5, 212.7, 225.1                                                                           | 46           | 3.6         | 23         | 3.0         | 23         | 4.5         | 13                        | 8.4        | 33               | 2.9         |
| Malignant and other neoplasms, NOS                                                   | C79.9, C80.0, C80.1, C96.9, D09.9, D36.9, D37-D44, D47-48                                                     | 199.0, 199.1, 202.9, 229.9, 235-237, 238.0-238.3, 238.79, 238.8, 238.9, 239                                                               | 22           | 1.7         | 11         | 1.4         | 11         | 2.2         | 3                         | 1.9        | 19               | 1.7         |
| <b>Cardiac</b>                                                                       |                                                                                                               |                                                                                                                                           | <b>72</b>    |             | <b>50</b>  |             | <b>22</b>  |             | <b>20</b>                 |            | <b>52</b>        |             |
| Rheumatic and other valvular heart disease                                           | I00-I09, add I34-I39                                                                                          | 390-398, 424                                                                                                                              | 5            | 0.4         | 3          | 0.4         | 2          | 0.4         | 1                         | 0.6        | 4                | 0.4         |
| Hypertensive heart disease                                                           | I11, I13                                                                                                      | 402, 404                                                                                                                                  | 2            | 0.2         | 1          | 0.1         | 1          | 0.2         | 1                         | 0.6        | 1                | 0.1         |
| Ischemic heart disease, includes myocardial infarction                               | I20-25                                                                                                        | 410-414, 429.2, 429.7                                                                                                                     | 31           | 2.4         | 22         | 2.9         | 9          | 1.8         | 8                         | 5.2        | 23               | 2.0         |
| All other forms of heart disease                                                     | I26-I51, exclude I34-I39, and the 3 rows below                                                                | 415-429.1, 429.3-429.9, exclude the 3 rows below, exclude 424 (now in casco=54), exclude 427 but with 427.5, exclude 429.7 which is above | 5            | 0.4         | 4          | 0.5         | 1          | 0.2         | .                         |            | 5                | 0.4         |
| Cardiomyopathy and heart failure                                                     | I50, I42-I43                                                                                                  | 425, 428                                                                                                                                  | 25           | 2.0         | 16         | 2.1         | 9          | 1.8         | 8                         | 5.2        | 17               | 1.5         |
| cardiac dysrhythmias                                                                 | I47-I49                                                                                                       | 427 (excluding 427.5)                                                                                                                     | 3            | 0.2         | 3          | 0.4         | 0          | 0.0         | 1                         | 0.6        | 2                | 0.2         |

| Causes                                                                                  | ICD-10 Code                                 | ICD-9 Code                                     | Total Deaths |     | Male       |     | Female    |     | Participants <sup>a</sup> |     | Non-participants |     |
|-----------------------------------------------------------------------------------------|---------------------------------------------|------------------------------------------------|--------------|-----|------------|-----|-----------|-----|---------------------------|-----|------------------|-----|
|                                                                                         |                                             |                                                | N            | %   | N          | %   | N         | %   | N                         | %   | N                | %   |
| Heart disease, NOS                                                                      | I51.89, I51.9                               | 429.89, 429.9                                  | 1            | 0.1 | 1          | 0.1 | 0         | 0.0 | 1                         | 0.6 | 0                | 0.0 |
| <b>Pulmonary</b>                                                                        |                                             |                                                | <b>44</b>    |     | <b>31</b>  |     | <b>13</b> |     | <b>8</b>                  |     | <b>36</b>        |     |
| Influenza and pneumonia                                                                 | J09-J18                                     | 480-487                                        | 22           | 1.7 | 16         | 2.1 | 6         | 1.2 | 1                         | 0.6 | 21               | 1.9 |
| Chronic obstructive respiratory disease                                                 | J40-47                                      | 490-494, 496                                   | 7            | 0.5 | 7          | 0.9 | 0         | 0.0 | 4                         | 2.6 | 3                | 0.3 |
| Other respiratory diseases                                                              | J00-J06, J20-22, J30-J39, J60-J68, J70-J98, | 034.0, 460-466, 470-478, 495, 500-506, 508-519 | 7            | 0.5 | 2          | 0.3 | 5         | 1.0 | 1                         | 0.6 | 6                | 0.5 |
| Pneumonitis due to solids and liquids                                                   | J69                                         | 507                                            | 4            | 0.3 | 3          | 0.4 | 1         | 0.2 | 0                         | 0.0 | 4                | 0.4 |
| Other interstitial lung disease, includes pulmonary fibrosis                            | J84                                         | 515, 516                                       | 4            | 0.3 | 3          | 0.4 | 1         | 0.2 | 2                         | 1.3 | 2                | 0.2 |
| <b>Other health-related</b>                                                             |                                             |                                                | <b>169</b>   |     | <b>90</b>  |     | <b>79</b> |     | <b>41</b>                 |     | <b>128</b>       |     |
| Other infectious causes of death                                                        | A00-B99 excluding the 4 rows below          | 001-139 and 771.3 excluding the 4 rows below   | 9            | 0.7 | 6          | 0.8 | 3         | 0.6 | 0                         | 0   | 9                | 0.8 |
| Septicemia                                                                              | A40-A41                                     | 038                                            | 17           | 1.3 | 9          | 1.2 | 8         | 1.6 | 6                         | 3.9 | 11               | 1.0 |
| Viral hepatitis                                                                         | B15-B19                                     | 070                                            | 8            | 0.6 | 6          | 0.8 | 2         | 0.4 | 4                         | 2.6 | 4                | 0.4 |
| Human immunodeficiency virus disease                                                    | B20-B24                                     | 042-044                                        | 0            | 0   | 0          | 0   | 0         | 0   | 0                         | 0   | 0                | 0   |
| Infectious cause of death, unspecified                                                  | B94.9, B99.9                                | 136.9, 139.8                                   | 0            | 0   | 0          | 0   | 0         | 0   | 0                         | 0   | 0                | 0   |
| Diabetes mellitus                                                                       | E10-E14                                     | 250                                            | 7            | 0.5 | 3          | 0.4 | 4         | 0.8 | 2                         | 1.3 | 5                | 0.4 |
| Essential (primary) hypertension and hypertensive renal disease                         | I10, I12                                    | 401,403                                        | 1            | 0.1 | 1          | 0.1 | 0         | 0.0 | 1                         | 0.6 | 0                | 0.0 |
| Cerebrovascular diseases                                                                | I60-I69                                     | 430-434,436-438                                | 18           | 1.4 | 8          | 1.0 | 10        | 2.0 | 8                         | 5.2 | 10               | 0.9 |
| Other atherosclerotic and vascular disease                                              | I70, I71-I78, I80-I99 excluding I99.9       | 440, 441-448, 451-459 excluding 459.9          | 6            | 0.5 | 3          | 0.4 | 3         | 0.6 | 4                         | 2.6 | 2                | 0.2 |
| Chronic liver disease and cirrhosis                                                     | K70, K73-K74                                | 571                                            | 9            | 0.7 | 3          | 0.4 | 6         | 1.2 | 1                         | 0.6 | 21               | 1.9 |
| Renal failure                                                                           | N17-N19                                     | 584-586                                        | 10           | 0.8 | 6          | 0.8 | 4         | 0.8 | 4                         | 2.6 | 3                | 0.3 |
| Complications of pregnancy, childbirth and the puerperium                               | O00-099                                     | 630-676                                        | 1            | 0.1 | 0          | 0.0 | 1         | 0.2 | 1                         | 0.6 | 6                | 0.5 |
| Congenital malformations, deformations, and chromosomal abnormalities                   | Q00-Q99                                     | 740-759                                        | 5            | 0.4 | 3          | 0.4 | 2         | 0.4 | 0                         | 0.0 | 4                | 0.4 |
| Symptoms, signs and abnormal clinical and laboratory findings, not elsewhere classified | R00-R99                                     | 780-799                                        | 11           | 0.9 | 5          | 0.6 | 6         | 1.2 | 2                         | 1.3 | 2                | 0.2 |
| All other diseases (Residual)                                                           | All other known codes                       | All other known codes                          | 67           | 5.2 | 37         | 4.8 | 30        | 5.9 | 9                         | 5.8 | 58               | 5.2 |
| <b>External</b>                                                                         |                                             |                                                | <b>139</b>   |     | <b>104</b> |     | <b>35</b> |     | <b>18</b>                 |     | <b>121</b>       |     |
| All transport accidents, includes motor vehicle collision                               | V01-V99, Y85                                | E800-E848, E929.0, E929.1                      | 44           | 3.4 | 32         | 4.2 | 12        | 2.3 | 2                         | 1.3 | 42               | 3.7 |
| Falls                                                                                   | W00-W19                                     | E880-E888                                      | 4            | 0.3 | 3          | 0.4 | 1         | 0.2 | 1                         | 0.6 | 3                | 0.3 |

| Causes                                                    | ICD-10 Code                                      | ICD-9 Code                                         | Total Deaths |     | Male |     | Female |     | Participants <sup>a</sup> |     | Non-participants |     |
|-----------------------------------------------------------|--------------------------------------------------|----------------------------------------------------|--------------|-----|------|-----|--------|-----|---------------------------|-----|------------------|-----|
|                                                           |                                                  |                                                    | N            | %   | N    | %   | N      | %   | N                         | %   | N                | %   |
| Other and unspecified nontransport accidents and sequelae | W20-W64, W65-W99, X00-X09, X10-X39, X50-X59, Y86 | E890-E909, E910-E924.0, E924.8-E928, E929.2-E929.9 | 14           | 1.1 | 11   | 1.4 | 3      | 0.6 | 2                         | 1.3 | 12               | 1.1 |
| Accidental poisoning and exposure to noxious substances   | X40-X49                                          | E850-E869, E924.1                                  | 21           | 1.6 | 15   | 1.9 | 6      | 1.2 | 7                         | 4.5 | 14               | 1.2 |
| Suicide                                                   | X60-X84, Y87                                     | E950-E959                                          | 30           | 2.3 | 26   | 3.4 | 4      | 0.8 | 2                         | 1.3 | 28               | 2.5 |
| Homicide                                                  | X92-Y09, Y87.1                                   | E960-E969                                          | 11           | 0.9 | 6    | 0.8 | 5      | 1.0 | 2                         | 1.3 | 9                | 0.8 |
| Other external causes of death                            | Y10-Y36, Y87.2, Y89.0, Y89.1, Y89.9,             | E970-E978, E990-E999                               | 5            | 0.4 | 5    | 0.6 | 0      | 0.0 | 1                         | 0.6 | 4                | 0.4 |
| Complications of medical and surgical care                | Y40-Y84, Y88                                     | E870-E879, E930-E949                               | 10           | 0.8 | 6    | 0.8 | 4      | 0.8 | 1                         | 0.6 | 9                | 0.8 |
| Unknown                                                   |                                                  |                                                    | 12           | 0.9 | 4    | 0.5 | 8      | 1.6 | 0                         | 0.0 | 12               | 1.1 |

<sup>a</sup> Includes pediatric and adult participants

**eTable 4.** Mortality Rates (Deaths/1000 Person-Years) by Cause of Death Among All Eligible St Jude Lifetime Cohort Survivors by Every 5-year Period Since Childhood Cancer Diagnosis

| Time from diagnosis (Years) | All-cause |             | Recurrence |            | Health-related     |             |                     |            |         |           |           |           |                      |            | External |           |
|-----------------------------|-----------|-------------|------------|------------|--------------------|-------------|---------------------|------------|---------|-----------|-----------|-----------|----------------------|------------|----------|-----------|
|                             |           |             |            |            | All Health-related |             | Subsequent Neoplasm |            | Cardiac |           | Pulmonary |           | Other Health-related |            |          |           |
|                             | Rate      | 95% CI      | Rate       | 95% CI     | Rate               | 95% CI      | Rate                | 95% CI     | Rate    | 95% CI    | Rate      | 95% CI    | Rate                 | 95% CI     | Rate     | 95% CI    |
| 5-9                         | 13.0      | 11.9 - 14.1 | 9.2        | 8.3 - 10.1 | 3.1                | 2.6 - 3.6   | 1.9                 | 1.5 - 2.4  | 0.1     | 0.0 - 0.2 | 0.2       | 0.1 - 0.4 | 0.8                  | 0.6 - 1.1  | 0.7      | 0.4 - 1.0 |
| 10-14                       | 5.7       | 4.9 - 6.6   | 2.1        | 1.7 - 2.7  | 2.8                | 2.3 - 3.5   | 2.0                 | 1.6 - 2.6  | 0.1     | 0.0 - 0.3 | 0.2       | 0.0 - 0.4 | 0.6                  | 0.3 - 0.9  | 0.7      | 0.4 - 1.1 |
| 15-19                       | 5.4       | 4.5 - 6.4   | 0.8        | 0.5 - 1.3  | 3.4                | 2.7 - 4.2   | 1.9                 | 1.4 - 2.5  | 0.4     | 0.2 - 0.7 | 0.3       | 0.1 - 0.6 | 0.8                  | 0.5 - 1.2  | 1.1      | 0.7 - 1.6 |
| 20-24                       | 5.7       | 4.7 - 6.9   | 0.5        | 0.3 - 1.0  | 3.8                | 3.0 - 4.8   | 2.3                 | 1.7 - 3.1  | 0.6     | 0.3 - 1.0 | 0.2       | 0.0 - 0.5 | 0.8                  | 0.4 - 1.3  | 1.3      | 0.8 - 1.9 |
| 25-29                       | 6.1       | 4.8 - 7.5   | 0.4        | 0.2 - 0.9  | 4.6                | 3.6 - 5.9   | 2.2                 | 1.5 - 3.1  | 0.7     | 0.3 - 1.3 | 0.3       | 0.1 - 0.7 | 1.4                  | 0.9 - 2.2  | 0.9      | 0.5 - 1.6 |
| 30-34                       | 9.1       | 7.2 - 11.3  | 0.3        | 0.1 - 1.0  | 7.2                | 5.6 - 9.2   | 2.8                 | 1.9 - 4.2  | 1.1     | 0.5 - 2.0 | 0.9       | 0.4 - 1.7 | 2.4                  | 1.5 - 3.6  | 1.4      | 0.8 - 2.4 |
| 35-39                       | 16.5      | 13.1 - 20.5 | 0.2        | 0.0 - 1.1  | 14.7               | 11.5 - 18.5 | 6.8                 | 4.7 - 9.6  | 3.0     | 1.7 - 5.0 | 0.8       | 0.2 - 2.1 | 4.0                  | 2.5 - 6.2  | 1.4      | 0.6 - 2.9 |
| 40+                         | 20.8      | 15.9 - 26.7 | 0.3        | 0.0 - 1.9  | 19.4               | 14.7 - 25.1 | 8.8                 | 5.8 - 13.0 | 3.1     | 1.4 - 5.8 | 0.7       | 0.1 - 2.5 | 6.8                  | 4.2 - 10.5 | 1.0      | 0.2 - 3.0 |
| All years                   | 8.6       | 8.1 - 9.1   | 3.3        | 3.0 - 3.6  | 4.3                | 3.9 - 4.6   | 2.4                 | 2.1 - 2.6  | 0.5     | 0.4 - 0.6 | 0.3       | 0.2 - 0.4 | 1.1                  | 1.0 - 1.3  | 0.9      | 0.8 - 1.1 |



**eTable 5.** All-Cause and Cause-Specific Standardized Mortality Ratios (SMRs) and 95% CIs Among Eligible St Jude Lifetime Cohort Survivors (n = 9440) by Sex and Childhood Cancer Diagnosis

| Characteristic                       | Deaths by Cause     |      |             |                    |      |             |                      |       |              |                |      |             |           |      |              |                      |      |             |          |     |            |
|--------------------------------------|---------------------|------|-------------|--------------------|------|-------------|----------------------|-------|--------------|----------------|------|-------------|-----------|------|--------------|----------------------|------|-------------|----------|-----|------------|
|                                      | All-cause Mortality |      |             | All Health-related |      |             | Subsequent Neoplasms |       |              | Health-related |      |             | Pulmonary |      |              | Other Health-related |      |             | External |     |            |
|                                      | N                   | SMR  | 95% CI      | N                  | SMR  | 95% CI      | N                    | SMR   | 95% CI       | N              | SMR  | 95% CI      | N         | SMR  | 95% CI       | N                    | SMR  | 95% CI      | N        | SMR | 95% CI     |
| <b>All patients</b>                  | 1,281               | 7.6  | 7.2 - 8.1   | 638                | 7.6  | 7.0 - 8.2   | 353                  | 16.0  | 14.4 - 17.8  | 72             | 4.2  | 3.3 - 5.3   | 44        | 9.0  | 6.5 - 12.0   | 169                  | 4.3  | 3.7 - 5.0   | 139      | 1.6 | 1.4 - 1.9  |
| <b>Sex</b>                           |                     |      |             |                    |      |             |                      |       |              |                |      |             |           |      |              |                      |      |             |          |     |            |
| Male                                 | 770                 | 6.3  | 5.9 - 6.8   | 355                | 6.6  | 5.9 - 7.3   | 184                  | 14.8  | 12.8 - 17.1  | 50             | 3.9  | 2.9 - 5.2   | 31        | 10.5 | 7.2 - 15.0   | 90                   | 3.5  | 2.8 - 4.3   | 104      | 1.5 | 1.3 - 1.9  |
| Female                               | 511                 | 11.0 | 10.1 - 12.0 | 283                | 9.6  | 8.5 - 10.7  | 169                  | 17.5  | 14.9 - 20.3  | 22             | 4.9  | 3.1 - 7.5   | 13        | 6.6  | 3.5 - 11.3   | 79                   | 5.8  | 4.6 - 7.3   | 35       | 2.1 | 1.4 - 2.9  |
| <b>Diagnosis</b>                     |                     |      |             |                    |      |             |                      |       |              |                |      |             |           |      |              |                      |      |             |          |     |            |
| <b>Leukemia</b>                      |                     |      |             |                    |      |             |                      |       |              |                |      |             |           |      |              |                      |      |             |          |     |            |
| Acute lymphoblastic leukemia         | 303                 | 6.2  | 5.5 - 6.9   | 145                | 6.1  | 5.1 - 7.2   | 97                   | 15.5  | 12.6 - 18.9  | 10             | 2.1  | 1.0 - 3.9   | 9         | 6.4  | 2.9 - 12.2   | 29                   | 2.5  | 1.7 - 3.7   | 26       | 1.0 | 0.7 - 1.5  |
| Acute myeloid leukemia               | 38                  | 7.9  | 5.6 - 10.8  | 20                 | 9.4  | 5.7 - 14.5  | 8                    | 14.9  | 6.4 - 29.4   | 2              | 5.0  | 0.6 - 18.0  | 3         | 23.5 | 4.7 - 68.7   | 7                    | 6.5  | 2.6 - 13.5  | 6        | 2.2 | 0.8 - 4.9  |
| Chronic myeloid leukemia             | 14                  | 13.3 | 7.3 - 22.3  | 5                  | 9.7  | 3.1 - 22.6  | 3                    | 20.4  | 4.1 - 59.5   | 0              | 0.0  | 0.0 - 40.5  | 0         | 0.0  | 0.0 - 117.4  | 2                    | 8.1  | 0.9 - 29.4  | 0        | 0.0 | 0.0 - 6.9  |
| Other                                | 2                   | 13.8 | 1.5 - 49.8  | 2                  | 33.1 | 3.7 - 119.6 | 0                    | 0.0   | 0.0 - 260.3  | 0              | 0.0  | 0.0 - 299.1 | 0         | 0.0  | 0.0 - 1073.0 | 2                    | 65.8 | 7.4 - 237.4 | 0        | 0.0 | 0.0 - 43.6 |
| <b>Central nervous system tumors</b> |                     |      |             |                    |      |             |                      |       |              |                |      |             |           |      |              |                      |      |             |          |     |            |
| Astrocytoma                          | 86                  | 15.5 | 12.4 - 19.2 | 35                 | 18.0 | 12.5 - 25.0 | 16                   | 34.3  | 19.6 - 55.7  | 1              | 3.1  | 0.0 - 17.1  | 4         | 31.2 | 8.4 - 79.9   | 14                   | 13.6 | 7.4 - 22.9  | 7        | 1.9 | 0.8 - 4.0  |
| Medulloblastoma                      | 54                  | 17.8 | 13.3 - 23.2 | 18                 | 16.5 | 9.8 - 26.1  | 16                   | 62.4  | 35.7 - 101.4 | 0              | 0.0  | 0.0 - 18.5  | 0         | 0.0  | 0.0 - 53.6   | 2                    | 3.5  | 0.4 - 12.8  | 2        | 1.0 | 0.1 - 3.7  |
| Ependymoma                           | 64                  | 60.3 | 46.4 - 77.0 | 18                 | 45.8 | 27.1 - 72.4 | 12                   | 124.9 | 64.5 - 218.2 | 0              | 0.0  | 0.0 - 61.4  | 1         | 36.3 | 0.5 - 202.0  | 5                    | 23.9 | 7.7 - 55.7  | 2        | 3.0 | 0.3 - 10.8 |
| Craniopharyngioma                    | 20                  | 14.6 | 8.9 - 22.6  | 13                 | 28.0 | 14.9 - 47.9 | 7                    | 69.5  | 27.9 - 143.3 | 0              | 0.0  | 0.0 - 41.8  | 1         | 34.7 | 0.5 - 193.3  | 5                    | 20.3 | 6.5 - 47.4  | 1        | 1.1 | 0.0 - 6.2  |
| Other                                | 13                  | 18.4 | 9.8 - 31.5  | 7                  | 31.7 | 12.7 - 65.4 | 2                    | 38.9  | 4.4 - 140.6  | 0              | 0.0  | 0.0 - 112.6 | 0         | 0.0  | 0.0 - 236.8  | 5                    | 41.3 | 13.3 - 96.5 | 0        | 0.0 | 0.0 - 7.6  |
| <b>Hodgkin lymphoma</b>              |                     |      |             |                    |      |             |                      |       |              |                |      |             |           |      |              |                      |      |             |          |     |            |
| Hodgkin lymphoma                     | 185                 | 7.2  | 6.2 - 8.4   | 137                | 9.3  | 7.8 - 11.1  | 68                   | 16.8  | 13.1 - 21.4  | 32             | 10.1 | 6.9 - 14.3  | 10        | 12.1 | 5.8 - 22.2   | 27                   | 4.1  | 2.7 - 5.9   | 20       | 1.8 | 1.1 - 2.8  |
| <b>Non-Hodgkin lymphoma</b>          |                     |      |             |                    |      |             |                      |       |              |                |      |             |           |      |              |                      |      |             |          |     |            |
| Non-Hodgkin lymphoma                 | 74                  | 4.6  | 3.6 - 5.8   | 51                 | 6.3  | 4.7 - 8.3   | 23                   | 11.3  | 7.1 - 16.9   | 10             | 5.6  | 2.7 - 10.2  | 4         | 8.9  | 2.4 - 22.7   | 14                   | 3.7  | 2.0 - 6.2   | 15       | 1.9 | 1.1 - 3.1  |
| <b>Renal</b>                         |                     |      |             |                    |      |             |                      |       |              |                |      |             |           |      |              |                      |      |             |          |     |            |
| Renal                                | 50                  | 5.4  | 4.0 - 7.2   | 21                 | 5.0  | 3.1 - 7.7   | 9                    | 8.4   | 3.9 - 16.0   | 0              | 0.0  | 0.0 - 4.6   | 1         | 4.0  | 0.1 - 22.2   | 11                   | 5.3  | 2.7 - 9.5   | 13       | 2.6 | 1.4 - 4.4  |
| <b>Neuroblastoma</b>                 |                     |      |             |                    |      |             |                      |       |              |                |      |             |           |      |              |                      |      |             |          |     |            |
| Neuroblastoma                        | 73                  | 12.0 | 9.4 - 15.1  | 16                 | 6.1  | 3.5 - 9.9   | 11                   | 16.5  | 8.2 - 29.5   | 0              | 0.0  | 0.0 - 7.6   | 1         | 6.2  | 0.1 - 34.5   | 4                    | 3.1  | 0.8 - 7.8   | 8        | 2.3 | 1.0 - 4.6  |
| <b>Soft tissue sarcoma</b>           |                     |      |             |                    |      |             |                      |       |              |                |      |             |           |      |              |                      |      |             |          |     |            |
| Soft tissue sarcoma                  | 77                  | 6.9  | 5.5 - 8.6   | 37                 | 6.7  | 4.7 - 9.3   | 20                   | 14.2  | 8.6 - 21.9   | 6              | 5.2  | 1.9 - 11.2  | 0         | 0.0  | 0.0 - 11.7   | 11                   | 4.2  | 2.1 - 7.5   | 9        | 1.6 | 0.7 - 3.0  |
| <b>Ewing sarcoma</b>                 |                     |      |             |                    |      |             |                      |       |              |                |      |             |           |      |              |                      |      |             |          |     |            |
| Ewing sarcoma                        | 66                  | 10.1 | 7.8 - 12.8  | 23                 | 6.2  | 3.9 - 9.3   | 5                    | 5.0   | 1.6 - 11.7   | 5              | 6.0  | 1.9 - 14.0  | 1         | 4.6  | 0.1 - 25.6   | 12                   | 7.3  | 3.7 - 12.7  | 9        | 3.2 | 1.4 - 6.0  |
| <b>Osteosarcoma</b>                  |                     |      |             |                    |      |             |                      |       |              |                |      |             |           |      |              |                      |      |             |          |     |            |
| Osteosarcoma                         | 52                  | 5.9  | 4.4 - 7.7   | 24                 | 4.5  | 2.9 - 6.7   | 13                   | 8.7   | 4.6 - 14.9   | 4              | 3.3  | 0.9 - 8.5   | 2         | 6.3  | 0.7 - 22.8   | 5                    | 2.1  | 0.7 - 5.0   | 6        | 1.7 | 0.6 - 3.8  |
| <b>Retinoblastoma</b>                |                     |      |             |                    |      |             |                      |       |              |                |      |             |           |      |              |                      |      |             |          |     |            |
| Retinoblastoma                       | 30                  | 6.6  | 4.4 - 9.4   | 24                 | 11.3 | 7.3 - 16.9  | 21                   | 38.2  | 23.6 - 58.4  | 0              | 0.0  | 0.0 - 9.5   | 0         | 0.0  | 0.0 - 28.4   | 3                    | 2.9  | 0.6 - 8.4   | 3        | 1.2 | 0.2 - 3.6  |
| <b>Germ cell tumor</b>               |                     |      |             |                    |      |             |                      |       |              |                |      |             |           |      |              |                      |      |             |          |     |            |
| Germ cell tumor                      | 18                  | 5.0  | 3.0 - 7.9   | 14                 | 7.1  | 3.9 - 11.9  | 7                    | 12.1  | 4.9 - 25.0   | 0              | 0.0  | 0.0 - 10.4  | 4         | 33.0 | 8.9 - 84.4   | 3                    | 3.3  | 0.7 - 9.6   | 1        | 0.6 | 0.0 - 3.4  |
| <b>Liver malignancies</b>            |                     |      |             |                    |      |             |                      |       |              |                |      |             |           |      |              |                      |      |             |          |     |            |
| Liver malignancies                   | 5                   | 4.7  | 1.5 - 11.0  | 2                  | 4.7  | 0.5 - 17.1  | 0                    | 0.0   | 0.0 - 36.6   | 1              | 12.3 | 0.2 - 68.4  | 0         | 0.0  | 0.0 - 145.7  | 1                    | 4.7  | 0.1 - 26.0  | 0        | 0.0 | 0.0 - 5.7  |
| <b>Melanoma</b>                      |                     |      |             |                    |      |             |                      |       |              |                |      |             |           |      |              |                      |      |             |          |     |            |
| Melanoma                             | 7                   | 5.8  | 2.3 - 12.0  | 2                  | 3.1  | 0.4 - 11.3  | 2                    | 12.0  | 1.3 - 43.2   | 0              | 0.0  | 0.0 - 25.3  | 0         | 0.0  | 0.0 - 100.4  | 0                    | 0.0  | 0.0 - 12.8  | 0        | 0.0 | 0.0 - 6.5  |
| <b>Nasopharyngeal carcinoma</b>      |                     |      |             |                    |      |             |                      |       |              |                |      |             |           |      |              |                      |      |             |          |     |            |
| Nasopharyngeal carcinoma             | 15                  | 9.4  | 5.2 - 15.4  | 8                  | 8.7  | 3.8 - 17.2  | 3                    | 12.1  | 2.4 - 35.4   | 0              | 0.0  | 0.0 - 18.5  | 3         | 58.7 | 11.8 - 171.4 | 2                    | 4.8  | 0.5 - 17.3  | 5        | 7.3 | 2.4 - 17.0 |
| <b>Histiocytosis</b>                 |                     |      |             |                    |      |             |                      |       |              |                |      |             |           |      |              |                      |      |             |          |     |            |
| Histiocytosis                        | 7                   | 2.0  | 0.8 - 4.1   | 3                  | 1.7  | 0.3 - 5.1   | 1                    | 2.2   | 0.0 - 12.3   | 0              | 0.0  | 0.0 - 10.1  | 0         | 0.0  | 0.0 - 36.5   | 2                    | 2.5  | 0.3 - 8.9   | 3        | 1.6 | 0.3 - 4.8  |
| <b>Other</b>                         |                     |      |             |                    |      |             |                      |       |              |                |      |             |           |      |              |                      |      |             |          |     |            |
| Other                                | 28                  | 12.1 | 8.0 - 17.5  | 13                 | 10.8 | 5.8 - 18.5  | 9                    | 26.9  | 12.3 - 51.1  | 1              | 4.3  | 0.1 - 24.1  | 0         | 0.0  | 0.0 - 51.5   | 3                    | 5.3  | 1.1 - 15.5  | 3        | 2.7 | 0.5 - 7.9  |

**eTable 6.** Multivariable Associations Between Modifiable Risk Factors, Including Specific Chronic Health Conditions and Postbaseline All-Cause and Cause-Specific Mortality Rates in Adult St Jude Lifetime Cohort Participants With an On-Campus Assessment

| Variable                                                           | Death by Cause |                  |                 |                    |                  |              |                                              |                   |              |                     |                   |             |                      |                   |              |            |                   |             |
|--------------------------------------------------------------------|----------------|------------------|-----------------|--------------------|------------------|--------------|----------------------------------------------|-------------------|--------------|---------------------|-------------------|-------------|----------------------|-------------------|--------------|------------|-------------------|-------------|
|                                                                    | Health-related |                  |                 |                    |                  |              |                                              |                   |              |                     |                   |             |                      |                   |              |            |                   |             |
|                                                                    | All-cause      |                  |                 | All Health-related |                  |              | Health-related Excluding Subsequent Neoplasm |                   |              | Subsequent Neoplasm |                   |             | Other Health-related |                   |              | External   |                   |             |
|                                                                    | RR             | 95% CI           | P               | RR                 | 95% CI           | P            | RR                                           | 95% CI            | P            | RR                  | 95% CI            | P           | RR                   | 95% CI            | P            | RR         | 95% CI            | P           |
| <b>Age at diagnosis</b>                                            |                |                  |                 |                    |                  |              |                                              |                   |              |                     |                   |             |                      |                   |              |            |                   |             |
| <5 (Ref)                                                           | -              |                  |                 | -                  |                  |              | -                                            |                   |              | -                   |                   |             | -                    |                   |              | -          |                   |             |
| 5-9                                                                | 0.8            | 0.5 - 1.5        | 0.51            | 0.8                | 0.4 - 1.5        | 0.53         | 0.8                                          | 0.4 - 2.0         | 0.70         | 0.9                 | 0.4 - 2.3         | 0.85        | 0.9                  | 0.3 - 2.6         | 0.90         | 1.0        | 0.2 - 6.4         | 0.97        |
| 10-14                                                              | 0.8            | 0.4 - 1.5        | 0.49            | 0.7                | 0.4 - 1.4        | 0.31         | 0.6                                          | 0.3 - 1.6         | 0.35         | 0.9                 | 0.3 - 2.4         | 0.84        | 0.2                  | 0.1 - 1.0         | 0.05         | 2.0        | 0.4 - 10.8        | 0.43        |
| 15-19                                                              | 0.9            | 0.5 - 1.6        | 0.63            | 0.8                | 0.4 - 1.5        | 0.44         | 0.8                                          | 0.3 - 1.9         | 0.58         | 0.9                 | 0.3 - 2.6         | 0.86        | 0.9                  | 0.3 - 2.7         | 0.80         | 2.4        | 0.4 - 16.2        | 0.37        |
| <b>Sex</b>                                                         |                |                  |                 |                    |                  |              |                                              |                   |              |                     |                   |             |                      |                   |              |            |                   |             |
| Male vs. Female (Ref)                                              | <b>1.9</b>     | <b>1.2 - 2.9</b> | <b>0.006</b>    | <b>1.7</b>         | <b>1.1 - 2.8</b> | <b>0.03</b>  | <b>2.7</b>                                   | <b>1.3 - 5.3</b>  | <b>0.006</b> | 1.1                 | 0.5 - 2.3         | 0.77        | 1.9                  | 0.8 - 4.5         | 0.17         | <b>6.6</b> | <b>1.5 - 29.1</b> | <b>0.01</b> |
| <b>Race</b>                                                        |                |                  |                 |                    |                  |              |                                              |                   |              |                     |                   |             |                      |                   |              |            |                   |             |
| Non-White vs. White (Ref)                                          | 0.8            | 0.4 - 1.4        | 0.36            | 0.8                | 0.5 - 1.6        | 0.57         | 0.8                                          | 0.4 - 1.9         | 0.65         | 0.7                 | 0.3 - 1.9         | 0.52        | 1.2                  | 0.4 - 3.6         | 0.69         | 0.4        | 0.1 - 2.6         | 0.36        |
| <b>Annual household income</b>                                     |                |                  |                 |                    |                  |              |                                              |                   |              |                     |                   |             |                      |                   |              |            |                   |             |
| ≥100K (Ref)                                                        | -              |                  |                 | -                  |                  |              | -                                            |                   |              | -                   |                   |             | -                    |                   |              | -          |                   |             |
| 60-99K                                                             | 1.0            | 0.5 - 2.0        | 0.95            | 1.0                | 0.5 - 2.2        | 0.95         | 0.6                                          | 0.2 - 1.7         | 0.38         | 1.9                 | 0.6 - 6.8         | 0.30        | 0.6                  | 0.2 - 2.3         | 0.47         | 0.5        | 0.1 - 4.8         | 0.58        |
| 20-59K                                                             | 1.0            | 0.5 - 1.9        | 0.91            | 1.0                | 0.5 - 2.1        | 0.99         | 0.6                                          | 0.2 - 1.5         | 0.26         | 2.2                 | 0.7 - 7.4         | 0.19        | 0.4                  | 0.1 - 1.5         | 0.19         | 0.7        | 0.1 - 5.1         | 0.75        |
| <20K                                                               | 0.7            | 0.3 - 1.6        | 0.42            | 0.8                | 0.3 - 2.1        | 0.68         | 0.5                                          | 0.2 - 1.9         | 0.32         | 1.6                 | 0.4 - 6.5         | 0.54        | 0.3                  | 0.1 - 1.8         | 0.20         | 0.2        | 0.0 - 2.6         | 0.20        |
| Missing                                                            | 1.2            | 0.5 - 2.9        | 0.62            | 1.3                | 0.5 - 3.3        | 0.60         | 1.6                                          | 0.5 - 5.4         | 0.42         | 0.7                 | 0.1 - 4.4         | 0.71        | 1.4                  | 0.3 - 6.2         | 0.63         | 0.5        | 0.0 - 5.6         | 0.55        |
| <b>Health insurance status</b>                                     |                |                  |                 |                    |                  |              |                                              |                   |              |                     |                   |             |                      |                   |              |            |                   |             |
| Private (Ref)                                                      | -              |                  |                 | -                  |                  |              | -                                            |                   |              | -                   |                   |             | -                    |                   |              | -          |                   |             |
| None                                                               | 1.3            | 0.7 - 2.3        | 0.39            | 1.1                | 0.6 - 2.1        | 0.81         | 0.9                                          | 0.4 - 2.3         | 0.85         | 1.4                 | 0.5 - 3.5         | 0.53        | 0.6                  | 0.2 - 2.1         | 0.44         | 4.0        | 0.8 - 19.4        | 0.09        |
| Public                                                             | <b>2.8</b>     | <b>1.6 - 4.7</b> | <b>&lt;.001</b> | <b>2.4</b>         | <b>1.4 - 4.3</b> | <b>0.002</b> | <b>2.5</b>                                   | <b>1.1 - 5.7</b>  | <b>0.03</b>  | <b>2.5</b>          | <b>1.1 - 5.8</b>  | <b>0.03</b> | 2.2                  | 0.8 - 6.4         | 0.13         | <b>6.8</b> | <b>1.2 - 38.3</b> | <b>0.03</b> |
| Missing                                                            | 2.4            | 0.7 - 8.6        | 0.18            | 1.9                | 0.4 - 8.7        | 0.41         | 2.5                                          | 0.5 - 12.8        | 0.28         | 0.0                 | 0.0 - 7.2         | 0.42        | 4.4                  | 0.7 - 26.7        | 0.10         | 5.3        | 0.3 - 105.8       | 0.28        |
| <b>Grade ≥2 modifiable chronic health conditions<sup>a,b</sup></b> |                |                  |                 |                    |                  |              |                                              |                   |              |                     |                   |             |                      |                   |              |            |                   |             |
| <b>Hypertension</b>                                                |                |                  |                 |                    |                  |              |                                              |                   |              |                     |                   |             |                      |                   |              |            |                   |             |
| Grade 1                                                            | 1.2            | 0.7 - 2.0        | 0.58            | 1.1                | 0.6 - 2.0        | 0.82         | 1.5                                          | 0.6 - 3.8         | 0.41         | 0.7                 | 0.3 - 1.7         | 0.47        | 1.0                  | 0.3 - 3.3         | 0.99         | 2.3        | 0.5 - 9.4         | 0.26        |
| Grade 2                                                            | <b>2.1</b>     | <b>1.2 - 3.7</b> | <b>0.01</b>     | <b>2.1</b>         | <b>1.1 - 3.9</b> | <b>0.02</b>  | <b>3.4</b>                                   | <b>1.3 - 8.5</b>  | <b>0.01</b>  | 1.4                 | 0.6 - 3.3         | 0.50        | 2.3                  | 0.7 - 7.2         | 0.17         | 0.8        | 0.1 - 5.8         | 0.82        |
| Grade 3                                                            | <b>2.2</b>     | <b>1.1 - 4.3</b> | <b>0.03</b>     | 1.9                | 0.9 - 3.9        | 0.11         | <b>3.6</b>                                   | <b>1.3 - 10.3</b> | <b>0.02</b>  | 0.7                 | 0.2 - 2.4         | 0.52        | 3.1                  | 0.8 - 12.1        | 0.10         | 3.0        | 0.3 - 32.2        | 0.36        |
| <b>Diabetes</b>                                                    |                |                  |                 |                    |                  |              |                                              |                   |              |                     |                   |             |                      |                   |              |            |                   |             |
| Grade 1                                                            | 1.1            | 0.7 - 1.8        | 0.68            | 1.1                | 0.7 - 1.9        | 0.62         | 0.9                                          | 0.4 - 1.8         | 0.73         | 1.7                 | 0.7 - 3.8         | 0.21        | 0.8                  | 0.3 - 2.2         | 0.71         | 0.8        | 0.2 - 4.4         | 0.81        |
| Grade 2                                                            | 1.2            | 0.6 - 2.4        | 0.69            | 1.5                | 0.7 - 3.2        | 0.31         | 1.4                                          | 0.5 - 3.8         | 0.50         | 1.5                 | 0.4 - 5.3         | 0.53        | 1.7                  | 0.5 - 5.9         | 0.44         | 0.0        | 0.0 - 3.2         | 0.20        |
| Grade 3                                                            | <b>2.4</b>     | <b>1.1 - 5.3</b> | <b>0.03</b>     | <b>3.2</b>         | <b>1.4 - 7.2</b> | <b>0.005</b> | 2.4                                          | 0.7 - 8.5         | 0.18         | <b>3.9</b>          | <b>1.3 - 11.7</b> | <b>0.01</b> | <b>4.5</b>           | <b>1.1 - 17.6</b> | <b>0.03</b>  | 0.0        | 0.0 - 2.9         | 0.16        |
| <b>Dyslipidemia</b>                                                |                |                  |                 |                    |                  |              |                                              |                   |              |                     |                   |             |                      |                   |              |            |                   |             |
| Grade 1                                                            | 0.6            | 0.3 - 1.1        | 0.10            | <b>0.4</b>         | <b>0.2 - 0.9</b> | <b>0.03</b>  | 0.4                                          | 0.2 - 1.2         | 0.10         | 0.5                 | 0.2 - 1.4         | 0.17        | 0.5                  | 0.2 - 1.6         | 0.24         | 1.2        | 0.3 - 5.1         | 0.82        |
| Grade 2                                                            | <b>0.6</b>     | <b>0.3 - 1.0</b> | <b>0.04</b>     | <b>0.5</b>         | <b>0.3 - 0.8</b> | <b>0.01</b>  | <b>0.3</b>                                   | <b>0.1 - 0.7</b>  | <b>0.005</b> | 0.8                 | 0.3 - 1.9         | 0.63        | <b>0.2</b>           | <b>0.1 - 0.7</b>  | <b>0.008</b> | 1.2        | 0.2 - 8.4         | 0.86        |
| Grade 3-4                                                          | 0.6            | 0.2 - 1.4        | 0.26            | 0.4                | 0.1 - 1.1        | 0.08         | 0.4                                          | 0.1 - 1.6         | 0.22         | 0.3                 | 0.0 - 2.1         | 0.20        | 0.6                  | 0.1 - 2.4         | 0.43         | 4.0        | 0.3 - 57.6        | 0.30        |
| <b>Bone mineral deficiency</b>                                     |                |                  |                 |                    |                  |              |                                              |                   |              |                     |                   |             |                      |                   |              |            |                   |             |
| Grade 2 vs. 0-1                                                    | 1.3            | 0.7 - 2.4        | 0.34            | 1.0                | 0.5 - 2.1        | 0.89         | 1.1                                          | 0.4 - 3.1         | 0.78         | 0.8                 | 0.3 - 2.2         | 0.68        | 1.2                  | 0.4 - 3.9         | 0.76         | 3.6        | 0.7 - 17.8        | 0.12        |
| <b>Hypogonadism</b>                                                |                |                  |                 |                    |                  |              |                                              |                   |              |                     |                   |             |                      |                   |              |            |                   |             |
| Grade 1                                                            | 1.5            | 0.8 - 2.6        | 0.19            | 1.8                | 1.0 - 3.3        | 0.07         | 1.2                                          | 0.5 - 2.9         | 0.64         | <b>2.7</b>          | <b>1.1 - 6.8</b>  | <b>0.04</b> | 1.8                  | 0.6 - 5.9         | 0.32         | 0.0        | 0.0 - 3.0         | 0.35        |
| Grade 2-3                                                          | 1.6            | 1.0 - 2.6        | 0.05            | 1.6                | 1.0 - 2.8        | 0.06         | 1.7                                          | 0.8 - 3.5         | 0.17         | 1.6                 | 0.7 - 3.5         | 0.24        | 3.4                  | 1.3 - 8.7         | 0.01         | 2.3        | 0.5 - 9.3         | 0.26        |
| <b>Hypothyroidism</b>                                              |                |                  |                 |                    |                  |              |                                              |                   |              |                     |                   |             |                      |                   |              |            |                   |             |
| Grade 2-3 vs. 0-1                                                  | 1.2            | 0.7 - 1.9        | 0.49            | 1.3                | 0.8 - 2.1        | 0.37         | 0.9                                          | 0.4 - 1.8         | 0.69         | 2.0                 | 0.9 - 4.2         | 0.08        | 0.6                  | 0.2 - 1.7         | 0.36         | 1.3        | 0.3 - 6.1         | 0.75        |
| <b>Adrenal insufficiency</b>                                       |                |                  |                 |                    |                  |              |                                              |                   |              |                     |                   |             |                      |                   |              |            |                   |             |
| Grade 1                                                            | 1.4            | 0.5 - 4.5        | 0.54            | 2.1                | 0.6 - 7.1        | 0.21         | 4.0                                          | 0.7 - 23.7        | 0.12         | 1.4                 | 0.3 - 7.4         | 0.68        | 2.2                  | 0.2 - 23.3        | 0.50         | 0.0        | 0.0 - 2.1         | 0.13        |

| Variable                                   | Death by Cause |                   |                 |                    |                    |                 |                                              |                   |                 |                     |            |      |                      |                   |                 |            |                  |             |
|--------------------------------------------|----------------|-------------------|-----------------|--------------------|--------------------|-----------------|----------------------------------------------|-------------------|-----------------|---------------------|------------|------|----------------------|-------------------|-----------------|------------|------------------|-------------|
|                                            | Health-related |                   |                 |                    |                    |                 |                                              |                   |                 |                     |            |      |                      |                   |                 |            |                  |             |
|                                            | All-cause      |                   |                 | All Health-related |                    |                 | Health-related Excluding Subsequent Neoplasm |                   |                 | Subsequent Neoplasm |            |      | Other Health-related |                   |                 | External   |                  |             |
|                                            | RR             | 95% CI            | P               | RR                 | 95% CI             | P               | RR                                           | 95% CI            | P               | RR                  | 95% CI     | P    | RR                   | 95% CI            | P               | RR         | 95% CI           | P           |
| Grade 2-3                                  | 0.7            | 0.2 - 3.2         | 0.67            | 1.0                | 0.2 - 4.7          | 0.95            | 2.1                                          | 0.2 - 18.7        | 0.49            | 0.5                 | 0.1 - 4.0  | 0.47 | 3.0                  | 0.3 - 28.1        | 0.33            | 0.0        | 0.0 - 2.4        | 0.14        |
| <b>Healthy lifestyle index<sup>c</sup></b> |                |                   |                 |                    |                    |                 |                                              |                   |                 |                     |            |      |                      |                   |                 |            |                  |             |
| 4 (Healthy in all 4; Ref)                  | -              |                   |                 | -                  |                    |                 | -                                            |                   |                 | -                   |            |      | -                    |                   |                 | -          |                  |             |
| 3                                          | 2.0            | 0.5 - 8.6         | 0.36            | 3.6                | 0.5 - 27.5         | 0.22            | 1.3                                          | 0.1 - 11.0        | 0.83            | 2.3                 | 0.3 - 17.9 | 0.43 | 1.2                  | 0.1 - 13.2        | 0.86            | 0.4        | 0.0 - 4.4        | 0.43        |
| 2                                          | 1.9            | 0.4 - 8.2         | 0.39            | 3.3                | 0.4 - 25.4         | 0.25            | 2.0                                          | 0.2 - 16.7        | 0.53            | 1.3                 | 0.2 - 10.1 | 0.82 | 1.9                  | 0.2 - 20.0        | 0.58            | 0.3        | 0.0 - 4.0        | 0.39        |
| 1                                          | 1.9            | 0.4 - 8.6         | 0.38            | 3.2                | 0.4 - 25.5         | 0.26            | 1.2                                          | 0.1 - 10.8        | 0.87            | 1.9                 | 0.2 - 15.7 | 0.53 | 1.4                  | 0.1 - 16.9        | 0.78            | 0.8        | 0.1 - 8.1        | 0.83        |
| 0 (Unhealthy in all 4)                     | 2.9            | 0.6 - 13.6        | 0.18            | 4.9                | 0.6 - 40.4         | 0.14            | 2.2                                          | 0.2 - 20.3        | 0.50            | 2.3                 | 0.2 - 22.1 | 0.46 | 4.9                  | 0.4 - 56.5        | 0.20            | 0.2        | 0.0 - 6.3        | 0.37        |
| <b>Area deprivation index</b>              |                |                   |                 |                    |                    |                 |                                              |                   |                 |                     |            |      |                      |                   |                 |            |                  |             |
| 1-10% (Ref)                                | -              |                   |                 | -                  |                    |                 | -                                            |                   |                 | -                   |            |      | -                    |                   |                 | -          |                  |             |
| 11-50%                                     | 3.4            | 0.8 - 14.7        | 0.10            | 6.8                | 0.9 - 51.7         | 0.06            | - <sup>c</sup>                               |                   |                 | 2.3                 | 0.3 - 18.5 | 0.42 | - <sup>c</sup>       |                   |                 | 0.3        | 0.0 - 4.1        | 0.39        |
| 51-80%                                     | <b>5.1</b>     | <b>1.2 - 21.9</b> | <b>0.03</b>     | <b>8.7</b>         | <b>1.1 - 66.5</b>  | <b>0.04</b>     | 1.3                                          | 0.6 - 3.0         | 0.52            | 3.0                 | 0.4 - 23.6 | 0.30 | 0.8                  | 0.3 - 2.4         | 0.74            | 1.5        | 0.1 - 15.8       | 0.72        |
| 81-100%                                    | <b>7.5</b>     | <b>1.7 - 32.9</b> | <b>0.007</b>    | <b>13.9</b>        | <b>1.8 - 106.7</b> | <b>0.01</b>     | <b>2.8</b>                                   | <b>1.2 - 6.6</b>  | <b>0.02</b>     | 3.8                 | 0.5 - 31.7 | 0.21 | 2.7                  | 1.0 - 7.5         | 0.05            | 2.0        | 0.2 - 23.8       | 0.57        |
| Unassigned                                 | <b>13.4</b>    | <b>2.9 - 60.6</b> | <b>&lt;.001</b> | <b>23.2</b>        | <b>2.9 - 184.8</b> | <b>0.003</b>    | <b>4.2</b>                                   | <b>1.6 - 11.4</b> | <b>0.004</b>    | 7.4                 | 0.8 - 66.2 | 0.07 | 1.8                  | 0.4 - 7.6         | 0.44            | 3.2        | 0.2 - 62.9       | 0.45        |
| <b>Frailty</b>                             |                |                   |                 |                    |                    |                 |                                              |                   |                 |                     |            |      |                      |                   |                 |            |                  |             |
| Not frail (Ref)                            | -              |                   |                 | -                  |                    |                 | -                                            |                   |                 | -                   |            |      | -                    |                   |                 | -          |                  |             |
| Prefrail                                   | 1.5            | 0.9 - 2.4         | 0.10            | <b>1.7</b>         | <b>1.0 - 2.9</b>   | <b>0.04</b>     | 1.7                                          | 0.8 - 3.5         | 0.17            | 2.0                 | 1.0 - 4.2  | 0.06 | 1.6                  | 0.6 - 4.0         | 0.33            | 0.6        | 0.1 - 3.4        | 0.53        |
| Frail                                      | <b>2.2</b>     | <b>1.3 - 3.8</b>  | <b>0.006</b>    | <b>2.4</b>         | <b>1.3 - 4.3</b>   | <b>0.006</b>    | <b>3.4</b>                                   | <b>1.5 - 7.7</b>  | <b>0.004</b>    | 1.6                 | 0.6 - 4.4  | 0.33 | 2.4                  | 0.8 - 7.2         | 0.12            | 4.2        | 0.9 - 19.8       | 0.07        |
| <b>Treatment</b>                           |                |                   |                 |                    |                    |                 |                                              |                   |                 |                     |            |      |                      |                   |                 |            |                  |             |
| <b>Alkylators (mg/m<sup>2</sup>)</b>       |                |                   |                 |                    |                    |                 |                                              |                   |                 |                     |            |      |                      |                   |                 |            |                  |             |
| None                                       | -              |                   |                 | -                  |                    |                 | -                                            |                   |                 | -                   |            |      | -                    |                   |                 | -          |                  |             |
| <8000                                      | 1.0            | 0.6 - 1.8         | 0.96            | 0.9                | 0.5 - 1.7          | 0.70            | 0.5                                          | 0.2 - 1.3         | 0.15            | 1.5                 | 0.6 - 4.0  | 0.39 | 0.3                  | 0.1 - 1.0         | 0.06            | 2.5        | 0.5 - 11.6       | 0.24        |
| ≥8000                                      | 0.9            | 0.5 - 1.5         | 0.57            | 0.9                | 0.5 - 1.5          | 0.63            | 0.7                                          | 0.3 - 1.5         | 0.34            | 1.2                 | 0.5 - 2.7  | 0.73 | 0.5                  | 0.2 - 1.5         | 0.23            | 0.5        | 0.1 - 3.4        | 0.47        |
| <b>Anthracyclines (mg/m<sup>2</sup>)</b>   |                |                   |                 |                    |                    |                 |                                              |                   |                 |                     |            |      |                      |                   |                 |            |                  |             |
| None                                       | -              |                   |                 | -                  |                    |                 | -                                            |                   |                 | -                   |            |      | -                    |                   |                 | -          |                  |             |
| 0.1-<250                                   | 0.8            | 0.5 - 1.4         | 0.49            | 0.7                | 0.4 - 1.2          | 0.19            | 0.7                                          | 0.3 - 1.5         | 0.34            | 0.6                 | 0.3 - 1.3  | 0.21 | 0.9                  | 0.3 - 2.4         | 0.81            | 1.2        | 0.2 - 6.7        | 0.82        |
| ≥250                                       | 0.7            | 0.4 - 1.5         | 0.36            | 0.9                | 0.4 - 1.8          | 0.71            | 1.4                                          | 0.6 - 3.3         | 0.50            | 0.3                 | 0.1 - 1.4  | 0.13 | 1.0                  | 0.2 - 3.9         | 0.97            | 0.3        | 0.0 - 3.1        | 0.29        |
| <b>Cranial irradiation (Gy)</b>            |                |                   |                 |                    |                    |                 |                                              |                   |                 |                     |            |      |                      |                   |                 |            |                  |             |
| None                                       | -              |                   |                 | -                  |                    |                 | -                                            |                   |                 | -                   |            |      | -                    |                   |                 | -          |                  |             |
| <20                                        | 0.7            | 0.3 - 1.8         | 0.42            | 1.0                | 0.4 - 2.8          | 0.97            | 0.8                                          | 0.1 - 3.8         | 0.73            | 1.4                 | 0.4 - 5.4  | 0.59 | 2.2                  | 0.4 - 12.6        | 0.39            | <b>0.0</b> | <b>0.0 - 0.5</b> | <b>0.01</b> |
| 20-<30                                     | 0.7            | 0.4 - 1.3         | 0.23            | 0.9                | 0.5 - 1.7          | 0.80            | 0.7                                          | 0.3 - 1.8         | 0.49            | 1.2                 | 0.5 - 3.1  | 0.66 | 1.7                  | 0.6 - 4.9         | 0.29            | <b>0.0</b> | <b>0.0 - 0.6</b> | <b>0.02</b> |
| ≥30                                        | 0.9            | 0.4 - 1.8         | 0.78            | 1.0                | 0.5 - 2.2          | 0.94            | 0.4                                          | 0.1 - 1.3         | 0.11            | 2.5                 | 0.9 - 6.8  | 0.07 | 1.1                  | 0.3 - 4.7         | 0.87            | 0.8        | 0.1 - 6.8        | 0.80        |
| <b>Chest radiation (Gy)</b>                |                |                   |                 |                    |                    |                 |                                              |                   |                 |                     |            |      |                      |                   |                 |            |                  |             |
| None                                       | -              |                   |                 | -                  |                    |                 | -                                            |                   |                 | -                   |            |      | -                    |                   |                 | -          |                  |             |
| <20                                        | <b>2.3</b>     | <b>1.0 - 5.4</b>  | <b>0.046</b>    | <b>2.6</b>         | <b>1.1 - 6.5</b>   | <b>0.04</b>     | <b>6.0</b>                                   | <b>1.9 - 19.0</b> | <b>0.002</b>    | 0.8                 | 0.2 - 4.4  | 0.81 | <b>5.2</b>           | <b>1.3 - 21.4</b> | <b>0.03</b>     | 3.4        | 0.3 - 41.0       | 0.34        |
| ≥20                                        | <b>3.2</b>     | <b>2.0 - 5.0</b>  | <b>&lt;.001</b> | <b>3.7</b>         | <b>2.3 - 6.2</b>   | <b>&lt;.001</b> | <b>7.2</b>                                   | <b>3.6 - 14.7</b> | <b>&lt;.001</b> | 1.8                 | 0.8 - 3.8  | 0.15 | <b>7.2</b>           | <b>2.8 - 18.3</b> | <b>&lt;.001</b> | 1.3        | 0.3 - 6.1        | 0.78        |

Adjusted for attained age as cubic splines; **Bolding indicates p<0.05**

<sup>a</sup> Excluding underweight/obesity due to inclusion in the healthy lifestyle index

<sup>b</sup> Smoking, drinking, exercise, and body mass index

<sup>c</sup> There were no deaths in the Area Deprivation Index 1-10% category, therefore 11-50% was used as the reference

**eTable 7.** Discrepant Cases Between National Death Index and St Jude Children’s Research Hospital Cause of Death Assignment

| National Death Index Classification                                                                     | St. Jude Children’s Hospital Reclassification                                                                                                                                                                                                                                                                                                                                                                                                                                                                                                       |
|---------------------------------------------------------------------------------------------------------|-----------------------------------------------------------------------------------------------------------------------------------------------------------------------------------------------------------------------------------------------------------------------------------------------------------------------------------------------------------------------------------------------------------------------------------------------------------------------------------------------------------------------------------------------------|
| Other malignant neoplasms of other and unspecified sites (C76-C80, C97)                                 | Malignant neoplasm of bone and articular cartilage of limbs<br>Malignant neoplasm of bone and articular cartilage of other and unspecified sites<br>Malignant neoplasm of brain<br>Malignant neoplasm of breast<br>Malignant neoplasm of liver and intrahepatic bile ducts (x2)<br>Myeloid leukemia<br><b>Other medical procedures as the cause of abnormal reaction of the patient, or of later complication, without mention of misadventure at the time of the procedure</b><br>Secondary malignant neoplasm of respiratory and digestive organs |
| Other and unspecified leukemia (207-208)                                                                | Lymphoid leukemia<br>Myeloid leukemia (x4)<br>Neoplasm of uncertain behavior of other and unspecified sites and<br>Secondary malignant neoplasm of other specified sites<br><b>Hemorrhage from respiratory passages</b><br>Malignant neoplasm of brain<br>Myelodysplastic syndromes (x2)                                                                                                                                                                                                                                                            |
| Malignant neoplasms of brain (C71)                                                                      | <b>Convulsions, not elsewhere classified</b><br><b>Other complications of surgical and medical care, not elsewhere classified</b><br><b>Other ill-defined and unspecified causes of mortality (x3)</b><br><b>Pneumonia, organism unspecified</b><br>Secondary malignant neoplasm of other sites                                                                                                                                                                                                                                                     |
| Neoplasms of uncertain or unknown behavior of specified sites (D37-D47)                                 | Malignant neoplasm of brain (x2)<br><b>Other complications of surgical and medical care, not elsewhere classified</b><br><b>Other septicemia</b><br><b>Viral pneumonia, not elsewhere classified</b><br>Malignant neoplasm of meninges<br>Malignant neoplasm of peripheral nerves and autonomic nervous system                                                                                                                                                                                                                                      |
| Myeloid leukemia (205, C92)                                                                             | <b>Bacterial infection in conditions classified elsewhere and of</b><br><b>Chronic liver disease and cirrhosis</b><br>Other malignant neoplasms of lymphoid and histiocytic tissue<br><b>Other interstitial pulmonary diseases</b>                                                                                                                                                                                                                                                                                                                  |
| Acute myocardial infarction (I21-I22)                                                                   | Secondary malignant neoplasm of respiratory and digestive organs                                                                                                                                                                                                                                                                                                                                                                                                                                                                                    |
| All other and unspecified disorders of circulatory system (I83-I99)                                     | Shock, not elsewhere classified                                                                                                                                                                                                                                                                                                                                                                                                                                                                                                                     |
| All other and unspecified viral diseases (A81, A85.0-A85.1, A85.8, A86-A89, B01, B04, B07-B09, B25-B34) | Influenza due to identified influenza virus                                                                                                                                                                                                                                                                                                                                                                                                                                                                                                         |
| All other congenital anomalies (743-744,748-759)                                                        | <b>Bacterial infection in conditions classified elsewhere and of</b>                                                                                                                                                                                                                                                                                                                                                                                                                                                                                |
| All other diseases of blood and blood-forming organs (286,288-289)                                      | <b>Malignant neoplasm of bone and articular cartilage</b>                                                                                                                                                                                                                                                                                                                                                                                                                                                                                           |
| All other diseases of nervous system (G10-G12, G23-G25, G31, G36-G37, G43-G44, G47-G72, G81-G98)        | <b>Malignant neoplasm of brain</b>                                                                                                                                                                                                                                                                                                                                                                                                                                                                                                                  |
| All other diseases of nervous system (G10-G12, G23-G25, G31, G36-G37, G43-G44, G47-G72, G81-G98)        | <b>Other septicemia</b>                                                                                                                                                                                                                                                                                                                                                                                                                                                                                                                             |
| All other diseases of respiratory system (512, 514-519, J80-J84, J93-J98)                               | Pneumonia, organism unspecified                                                                                                                                                                                                                                                                                                                                                                                                                                                                                                                     |
| All other diseases of urinary system (591,593,595-599)                                                  | <b>Malignant neoplasm of brain</b>                                                                                                                                                                                                                                                                                                                                                                                                                                                                                                                  |
| All other forms of chronic ischemic heart disease (I20, I25.1-I25.9)                                    | <b>Chronic liver disease and cirrhosis</b>                                                                                                                                                                                                                                                                                                                                                                                                                                                                                                          |
| All other forms of chronic ischemic heart disease (I20, I25.1-I25.9)                                    | <b>Hemorrhage from respiratory passages</b>                                                                                                                                                                                                                                                                                                                                                                                                                                                                                                         |
| All other forms of chronic ischemic heart disease (I20, I25.1-I25.9)                                    | <b>Intentional self-poisoning (suicide) by and exposure to other and unspecified drugs, medicaments, and biological substances</b>                                                                                                                                                                                                                                                                                                                                                                                                                  |

|                                                                                                                                 |                                                                                                                                                                                                  |
|---------------------------------------------------------------------------------------------------------------------------------|--------------------------------------------------------------------------------------------------------------------------------------------------------------------------------------------------|
| All other infectious and parasitic diseases and late effects of other infectious and parasitic diseases (100-104, 130-136, 139) | Human immunodeficiency virus infection with specified conditions                                                                                                                                 |
| Aplastic anemias (D60-D61)                                                                                                      | <b>Other complications of surgical and medical care, not elsewhere classified</b>                                                                                                                |
| Assault (homicide) by discharge of firearms (U01.4, X93-X95)                                                                    | <b>Peritonitis</b>                                                                                                                                                                               |
| Disorders of both mitral and aortic valves (I08.0)                                                                              | Discharge from other and unspecified firearms                                                                                                                                                    |
| Hodgkin's disease (C81, 201)                                                                                                    | <b>Postprocedural respiratory disorders, not elsewhere classified</b>                                                                                                                            |
| Influenza (J10-J11)                                                                                                             | <b>Cardiomyopathy</b>                                                                                                                                                                            |
| Lymphoid leukemia (204, C91)                                                                                                    | <b>Other septicemia</b>                                                                                                                                                                          |
| Malignant neoplasm of breast (C50)                                                                                              | <b>Respiratory conditions due to other external agents</b>                                                                                                                                       |
| Malignant neoplasm of eye and adnexa (C69)                                                                                      | Malignant neoplasm of connective and other soft tissue                                                                                                                                           |
| Malignant neoplasms of all other and unspecified sites (195-199)                                                                | Other interstitial pulmonary diseases                                                                                                                                                            |
| Malignant neoplasms of bone and articular cartilage (170, C40-C41)                                                              | <b>Bronchopneumonia, organism unspecified</b>                                                                                                                                                    |
| Malignant neoplasms of eye (190)                                                                                                | Myeloid leukemia                                                                                                                                                                                 |
| Malignant neoplasms of other and unspecified parts of nervous system (192)                                                      | <b>Cardiac arrest</b>                                                                                                                                                                            |
| Malignant neoplasms of other mesothelial and soft tissue (C47-C49)                                                              | Malignant immunoproliferative diseases                                                                                                                                                           |
| Malignant neoplasms of pharynx (C10-C13, C14.0)                                                                                 | Myeloid leukemia                                                                                                                                                                                 |
| Malignant neoplasms of testis (C62)                                                                                             | <b>Sequelae with surgical and medical care as external cause</b>                                                                                                                                 |
| Malignant neoplasms of thyroid and other endocrine glands (C73-C75)                                                             | <b>Heart failure</b>                                                                                                                                                                             |
| Malignant neoplasms of thyroid gland and other endocrine glands and related structures (193-194)                                | Malignant melanoma of skin                                                                                                                                                                       |
| Mycoses (110-118)                                                                                                               | Malignant neoplasm of bone and articular cartilage                                                                                                                                               |
| Neoplasms of unspecified nature (239)                                                                                           | Malignant neoplasm of retroperitoneum and peritoneum                                                                                                                                             |
| Non-Hodgkin's lymphoma (C82-C85)                                                                                                | Secondary malignant neoplasm of other specified sites                                                                                                                                            |
| Other chronic obstructive pulmonary disease (J44)                                                                               | <b>Heart failure</b>                                                                                                                                                                             |
| Other complications of medical and surgical care and their sequelae (Y70-Y84, Y88.2-Y88.3)                                      | Malignant neoplasm of other endocrine glands and related structures                                                                                                                              |
| Other congenital malformations and deformations (Q10-Q18, Q35-Q89)                                                              | Malignant neoplasm of brain                                                                                                                                                                      |
| Other direct obstetric causes (642.0-642.3, 644-646, 651-659, 661-665, 667-669)                                                 | <b>Hemorrhage, not elsewhere classified</b>                                                                                                                                                      |
| Other diseases of upper respiratory tract (J30-J39)                                                                             | Malignant neoplasm of brain                                                                                                                                                                      |
| Other malignant neoplasms of lymphoid and histiocytic tissue (202)                                                              | Malignant neoplasm of kidney, except renal pelvis                                                                                                                                                |
| Pneumonia due to other and unspecified organism (483,486)                                                                       | <b>Other ill-defined and unspecified causes of mortality</b>                                                                                                                                     |
| Renal tubulo-interstitial diseases (N10-N15)                                                                                    | <b>Respiratory conditions due to other external agents</b>                                                                                                                                       |
| Septicemia (A40-A41)                                                                                                            | Malignant neoplasm of brain                                                                                                                                                                      |
| Stroke, not specified as hemorrhage or infarction (I64)                                                                         | Malignant neoplasm of other connective and soft tissue                                                                                                                                           |
| Subarachnoid hemorrhage (I60)                                                                                                   | Malignant neoplasm of brain                                                                                                                                                                      |
| Viral hepatitis (B15-B19)                                                                                                       | Bacterial infection in conditions classified elsewhere and of                                                                                                                                    |
|                                                                                                                                 | Malignant neoplasm of brain                                                                                                                                                                      |
|                                                                                                                                 | Malignant neoplasm of brain                                                                                                                                                                      |
|                                                                                                                                 | Malignant neoplasm of retroperitoneum and peritoneum                                                                                                                                             |
|                                                                                                                                 | <b>Other ill-defined and unspecified causes of mortality</b>                                                                                                                                     |
|                                                                                                                                 | <b>Sequelae with surgical and medical care as external cause</b>                                                                                                                                 |
|                                                                                                                                 | Other septicemia                                                                                                                                                                                 |
|                                                                                                                                 | <b>Surgical operation and other surgical procedures as the cause of abnormal reaction of the patient, or of later complication, without mention of misadventure at the time of the procedure</b> |
|                                                                                                                                 | <b>Septicemia</b>                                                                                                                                                                                |
|                                                                                                                                 | Bacterial pneumonia, not elsewhere classified                                                                                                                                                    |
|                                                                                                                                 | Malignant neoplasm of connective and other soft tissue                                                                                                                                           |
|                                                                                                                                 | <b>Malignant neoplasm of connective and other soft tissue</b>                                                                                                                                    |
|                                                                                                                                 | <b>Acute pancreatitis</b>                                                                                                                                                                        |
|                                                                                                                                 | <b>Secondary malignant neoplasm of other sites</b>                                                                                                                                               |
|                                                                                                                                 | <b>Epilepsy</b>                                                                                                                                                                                  |
|                                                                                                                                 | <b>Malignant neoplasm of brain</b>                                                                                                                                                               |
|                                                                                                                                 | Chronic hepatitis, not elsewhere classified                                                                                                                                                      |

Bolded cases reflect a major reclassification, rather than greater specification of causes of death
