# Supplementary material for: Association of Modifiable Health Conditions and Social Determinants of Health With Late Mortality in Survivors of Childhood Cancer
Source: JAMA Netw Open. 2023 Feb 10;6(2):e2255395. doi: 10.1001/jamanetworkopen.2022.55395 (PMC9918884; doi:10.1001/jamanetworkopen.2022.55395)
Supplement: Supplement 2. — Data Sharing Statement [file jamanetwopen-e2255395-s002.pdf]

## Data Sharing Statement

Ehrhardt. Association of Modifiable Health Conditions and Social Determinants of Health With Late Mortality in Survivors of Childhood Cancer. *JAMA Netw Open*. Published February 10, 2023. doi:10.1001/jamanetworkopen.2022.55395

### Data

**Data available:** Yes

**Data types:** Deidentified participant data

**How to access data:** Deidentified data will be available in aggregate on the St. Jude Cloud at time of publication (<https://www.stjude.cloud/>) and in detail upon request.

**When available:** With publication

### Supporting Documents

**Document types:** None

### Additional Information

**Who can access the data:** The Cloud data are available to all. Detailed data will be available to researchers whose proposed use of the data has been approved

**Types of analyses:** For any research purpose.

**Mechanisms of data availability:** With a signed data access agreement.
